# Supplementary material for: Mortality Prediction Utilizing Blood Biomarkers to Predict the Severity of COVID-19 Using Machine Learning Technique
Source: Diagnostics (Basel). 2021 Aug 31;11(9):1582. doi: 10.3390/diagnostics11091582 (PMC8469072; doi:10.3390/diagnostics11091582)
Supplement: Supplementary file 1 [file diagnostics-11-01582-s001.zip › diagnostics-1312319-supplementary.pdf]

# Mortality Prediction Utilizing Blood Biomarkers to Predict the Severity of COVID-19 using Machine Learning Technique

Tawsifur Rahman<sup>1</sup>, Fajer A. Al-Ishaq<sup>2</sup>, Fatima S. Al-Mohannadi<sup>2</sup>, Reem S. Mubarak<sup>2</sup>, Maryam H. Al-Hitmi<sup>2</sup>, Khandaker Reajul Islam<sup>1</sup>, Amith Khandaker<sup>1</sup>, Ali Ait Hssain<sup>3</sup>, Somaya A. Al Maadeed<sup>4</sup>, Susu M. Zughaier<sup>\*2</sup>, Muhammad E. H. Chowdhury<sup>\*1</sup>

Supplementary Materials:

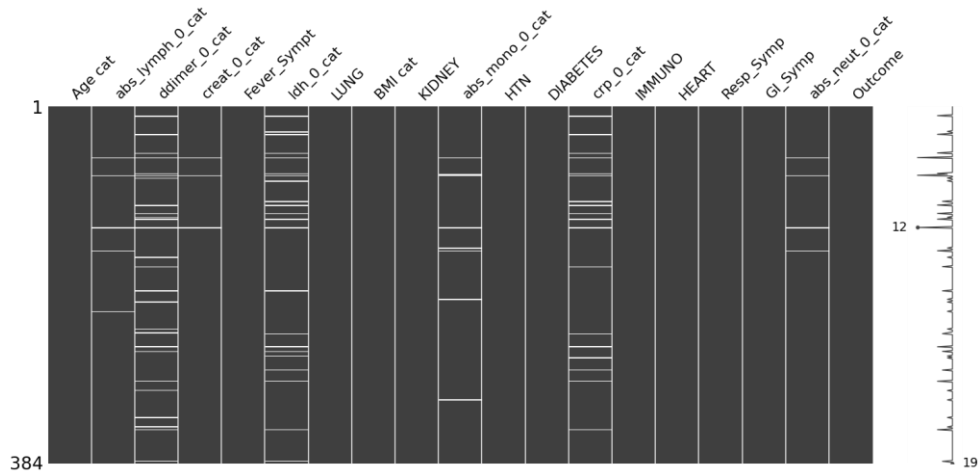

Supplementary Figure S1: The number of missing data for different features in Dataset-1.

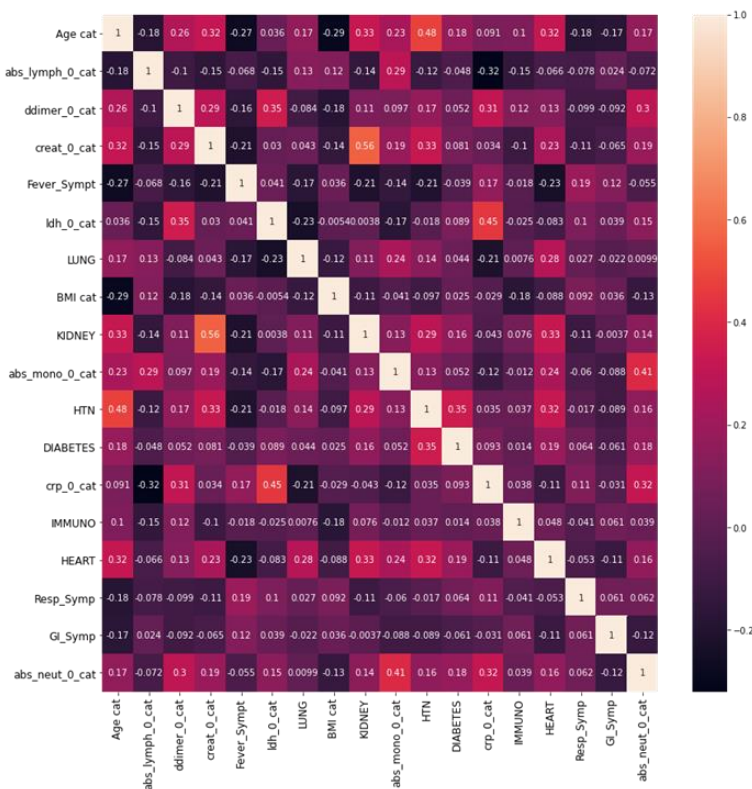

Supplementary Figure S2: Heatmap of correlation among different features.

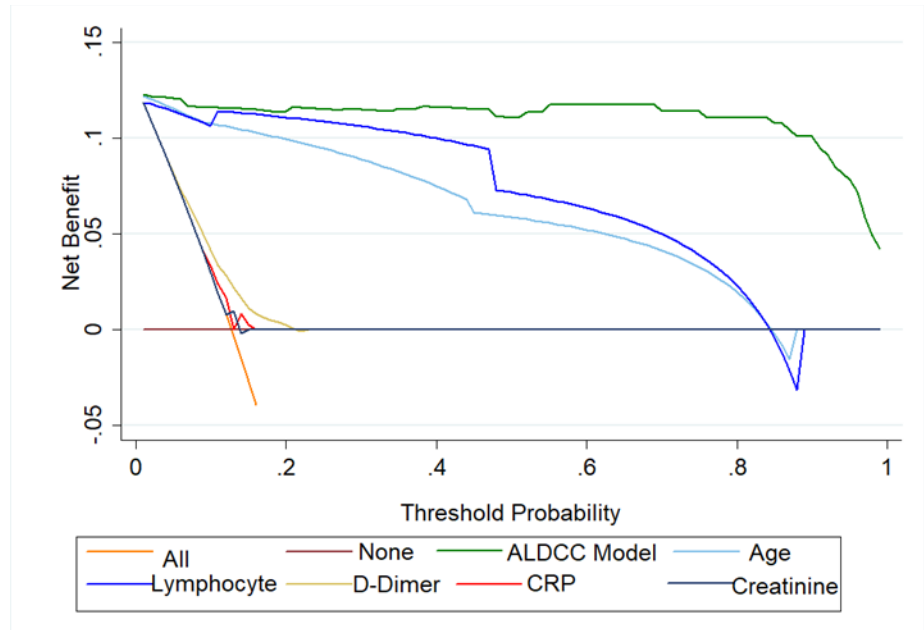

Supplementary Figure S3: Decision curves analysis stating the performance of the individual parameters and the developed model.

The image shows a mobile app interface for 'ALDCC score for mortality risk prediction'. The title is in white text on a maroon background. Below the title, a subtitle reads: '(ALDCC Scoring System for Prediction of Disease Severity Using Coagulopathy Biomarkers)'. The input section consists of five text boxes with placeholder text: 'please put patient's age eg. 57', 'Lymphocyte Count eg. 0.48 (lymphocytes/mcL)', 'D-Dimer eg. 550 (ng/ml)', 'CRP eg. 50 (mg/L)', and 'Creatinine eg. 0.59 (mg/dl)'. Below these is a maroon button with the word 'Predict' in white. At the bottom, a maroon footer contains the text: 'A novel COVID-19 project by Qatar University machine learning group. This app is developed by Tawfiqur Rahman.' The app is displayed on a smartphone frame.

Supplementary Figure S4: Mortality risk prediction App
